Nicholls, Rossi & Niven 2020

1 **Larval nutrition impacts survival to adulthood, body size, and the**  
2 **allometric scaling of metabolic rate in adult honeybees**

3 Elizabeth Nicholls<sup>1\*</sup>, Marta Rossi<sup>1</sup> & Jeremy E. Niven<sup>1</sup>

4 <sup>1</sup>School of Life Sciences, University of Sussex, Brighton, UK.

5 \*Corresponding Author [e.nicholls@sussex.ac.uk](mailto:e.nicholls@sussex.ac.uk)

6

7 **Key Words:** Diet Quality, Nutrition, Development, Metabolic Rate, Metabolic Scaling, Honeybee

Nicholls, Rossi & Niven 2020

## 8 **Summary statement**

9 We show, for the first time, that the nutritional quality of insect larval diets affects the scaling of  
10 metabolic rate with body mass in newly emerged adult honeybees.

## 11 **Abstract**

12 Resting metabolic rate (RMR) is a fundamental physiological measure linked to numerous aspects of  
13 organismal function, including lifespan. Although dietary restriction in insects during larval  
14 growth/development affects adult RMR, the impact of larval diet *quality* on adult RMR has not been  
15 studied. Using *in vitro* rearing to control larval diet quality, we determined the effect of dietary protein  
16 and carbohydrate on honeybee survival-to-adulthood, time-to-eclosion, body mass/size and adult RMR.  
17 High carbohydrate larval diets increased survival-to-adulthood and time-to-eclosion compared to both  
18 low carbohydrate and high protein diets. Upon emergence, bees reared on the high protein diet were  
19 smaller and lighter than those reared on other diets, whilst those raised on the high carbohydrate diet  
20 varied more in body mass. Newly emerged adult bees' reared on the high carbohydrate diet showed a  
21 significantly steeper increase in allometric scaling of RMR compared to those reared on other diets.  
22 This suggests that diet quality influences survival-to-adulthood, time-to-eclosion, and the allometric  
23 scaling of RMR. Given that agricultural intensification and increasing urbanisation have led to a  
24 decrease in both forage availability and dietary diversity for bees, our results are critical to improving  
25 understanding of the impacts of poor developmental nutrition on bee growth/development and  
26 physiology.

27

28

## 29 **1. Introduction**

30 The resting metabolic rate (RMR) of an organism can account for up to 50% of total energetic  
31 expenditure (Morgan, Shelly and Kimsey, 1985) and is intrinsically linked to numerous aspects of  
32 physiological and behavioural functioning, from reproductive output to lifespan (Speakman, 2005;  
33 Pettersen, Marshall and White, 2018). Despite this, surprisingly little is understood about the drivers of  
34 variation in RMR between organisms, particularly at the intra-specific level where consistent individual  
35 differences in RMR are frequently observed (McCarthy, 2000; Burton *et al.*, 2011). Both across and  
36 within many diverse taxa, RMR has been shown to scale allometrically with body size, with larger  
37 individuals having higher metabolic rates, and smaller individuals typically having higher mass-specific  
38 metabolic rates (Bartholomew, Lighton and Feener, 1988; Gillooly *et al.*, 2001; Brown *et al.*, 2004;  
39 Glazier, 2005; Chown *et al.*, 2007). Though the mechanism(s) underpinning allometric scaling of RMR  
40 remain highly debated (McNab, 1988; White and Seymour, 2003; Savage *et al.*, 2004), scaling  
41 exponents have been shown to be affected by several intrinsic and extrinsic factors, including activity  
42 level, temperature and diet (Glazier, 2005).

43 Metabolism is fuelled by food and therefore it is to be expected that an organisms' diet will have  
44 considerable impact on the resources available for energetic expenditure, yet the mechanism(s) by  
45 which diet affect RMR and the scaling of RMR remains poorly understood. As highlighted by Naya *et*  
46 *al.* (2007), in the short term (i.e. hours to days), diet may affect metabolism simply as a result of the  
47 energetic processes involved in digestion and absorption of nutrients (Roces and Lighton, 1995;  
48 Nespolo, Castañeda and Roff, 2005). In the longer term (i.e. weeks to months), the availability of certain  
49 nutrients in an organisms' diet may affect developmental processes such as organ growth or  
50 maintenance processes such as tissue repair (Anderson, 1993; Yang and Joern, 1994). In a number of  
51 taxa, including humans, restricting food during developmental stages has been shown to have long-term  
52 effects on adult metabolism (Desai and Hales, 1997; Moe *et al.*, 2004; Roark and Bjorndal, 2009),  
53 potentially allowing organisms to adapt to food scarcity in later life (Hales and Barker, 2001; Wang *et*  
54 *al.*, 2016). In many instances, however, organisms are more likely to experience a scarcity of particular  
55 nutrients, such as protein or carbohydrates, rather than a complete lack of food, and may be forced to  
56 provision their young with sub-optimal, unbalanced diets (Joern, Provin and Behmer, 2012). Yet direct  
57 tests of the impact of the nutritional *quality* of developmental diets on adult metabolism are relatively  
58 rare outside of epidemiological studies.

59 Making *a priori* directional predictions about how the nutritional quality of developmental diets  
60 might be expected to affect adult metabolic rates is challenging, because theoretical arguments can be  
61 made for both positive and negative associations between diet quality and RMR (McNab, 1986; Nussear  
62 *et al.*, 1998). Nutritional studies have shown that when offered diets of varying composition, organisms  
63 defend an optimal intake target of key macronutrients, in particular protein and carbohydrates which  
64 provide amino acids and energy vital for survival, growth and reproduction (Karasov, Martínez Del Rio  
65 and Caviedes-Vidal, 2011; Simpson and Raubenheimer, 2012; Roeder and Behmer, 2014). Optimal

Nicholls, Rossi & Niven 2020

66 intake targets can be achieved through behaviours such as selective or compensatory feeding, or  
67 physiological/morphological means such as increasing gut length or food retention time (Felton, 1996;  
68 Behmer, 2009; Burton *et al.*, 2011). Though insects have long been used as models to study the  
69 regulation of nutritional intake targets (Behmer, 2009) studies of the long-term impact of variation in  
70 nutrition over the course of development are somewhat lacking (Roeder and Behmer, 2014), and studies  
71 of the subsequent effects on adult metabolism are largely non-existent. A recent study found that adult  
72 stick insects exhibit developmental diet dependent differences in RMR when reared from birth on leaves  
73 from plant species varying in their nutritional content and digestibility (Hill, Silcocks and Andrew,  
74 2020), but the impact of developmental diet on the scaling of RMR and body mass was not considered.  
75 Shorter term studies conducted in adult insects only are more common, and have typically observed a  
76 reduction in RMR in response to a lower quality diet (Zanotto *et al.*, 1997; Ayayee *et al.*, 2018, 2020,  
77 but see Clark, Zera and Behmer, 2016).

78 Bees meet all their nutritional demands *via* pollen and nectar collected from flowers (their main  
79 source of protein and carbohydrate respectively), and unlike the nymphs and larvae of traditional  
80 models of insect nutrient regulation, such as locusts and caterpillars, bee larvae are entirely dependent  
81 on the provisioning choices of adult bees. This means bee larvae likely have very little opportunity to  
82 selectively regulate their intake of nutrients (but see Austin and Gilbert, 2018). Honeybees are unique  
83 among bees in that in-hive nurse bees process the pollen and nectar brought back to the nest by foragers,  
84 and convert it to a nutritional substance known as royal jelly which they then regurgitate for larvae  
85 (Wright, Nicolson and Shafir, 2018). Containing approximately 60% water, 15% protein, 20%  
86 carbohydrates, and 5% fats, the exact macronutrient content of royal jelly can vary between colonies  
87 and over time (Howe *et al.*, 1985; Garcia-Amoedo and De Almeida-Muradian, 2007; Ferioli, Armaforte  
88 and Caboni, 2014). Furthermore, a recent study has demonstrated that nurse honeybees are unable to  
89 discriminate between pollen diets on the basis of nutritional quality (protein and/or lipid content)  
90 (Corby-Harris *et al.*, 2018), meaning the proportion of macronutrients that individual larvae receive in  
91 their diet could vary, particularly in times or areas where the diversity of forage is limited (Donkersley  
92 *et al.*, 2017). In addition, there is recent evidence to suggest that rising CO<sub>2</sub> levels associated with  
93 climate change are negatively affecting the nutritional quality of pollen and nectar provided by plants  
94 (Ziska *et al.*, 2016). Given widespread concerns regarding the combined effects of habitat degradation  
95 and agricultural intensification on the availability of sufficiently diverse floral resources to meet the  
96 nutritional needs of adult bees and their offspring (Naug, 2009; Brodschneider and Crailsheim, 2010;  
97 Donkersley *et al.*, 2017), and the fact that bees provide a pollination service vital to global food security,  
98 the question of how developmental diets impact on the metabolic function of adult bees is extremely  
99 apposite.

100 Here we used *in vitro* rearing methods to tightly control honeybee larval diets independent of  
101 nurse bee behaviour, permitting an examination of the impact of diet nutritional composition on  
102 honeybee development and adult physiological function. Previous studies have shown that the ratio of

103 protein to carbohydrate in honeybee larval diets can have significant impacts on larval survival (Helm  
104 *et al.*, 2017), with unbalanced diets heavily skewed to either macronutrient resulting in poor growth and  
105 survival. To our knowledge this is the first study to test the RMR of adult bees reared on different larval  
106 diets *in vitro*. By manipulating the ratio of royal jelly (protein) to sugars (carbohydrates), we aimed to  
107 determine the impact of specific macro-nutrients on adult RMR and scaling with body size.

108

## 109 **2. Materials and Methods**

110 Honeybee (*Apis mellifera* L.) larvae were obtained from full-sized colonies housed on the  
111 University of Sussex campus, and reared in the laboratory using the *in vitro* method described by  
112 Schmehl *et al.* (2016). Briefly, three-day old larvae were removed from the comb using a grafting tool,  
113 transferred to individual wells of a 48-well cell culture plate, and placed into an incubator fixed at 35°C,  
114 94% relative humidity (RH). Larvae were fed once per day for five days, and upon pupation transferred  
115 to a fresh cell culture plate. Survival was monitored daily until adult emergence.

116

### 117 *Diet manipulation*

118 A standard *in vitro* rearing diet (Table 1) of yeast (Sigma-Aldrich UK), royal jelly (The Raw  
119 Honey Shop, Brighton) and sugars (glucose and fructose, Sigma-Aldrich UK) was manipulated to  
120 contain differing amounts of protein (using royal jelly as a proxy) and/or carbohydrate (glucose and  
121 fructose), following the methods of Helm *et al.* (2017). Larvae were reared on one of five diets (Table  
122 1, D1-5), where the amount of protein and carbohydrate was either increased or decreased relative to  
123 the diet described by Schmehl *et al.* (2016). Royal jelly was stored frozen at -20°C in 50 mL aliquots.  
124 Diets were freshly made every two days and stored at 4°C. Larvae were fed once per day for five days,  
125 and the volume of food varied according to the day of the experiment (Days 1 and 2 = 10 µL; Day 3 =  
126 20 µL; Day 4 = 30 µL; Day 5 = 40 µL; and Day 6 = 50 µL). Between 60 and 78 larvae were assigned to  
127 each treatment group ( $N = 371$  larvae in total; D1=78; D2=60; D3=78, D4=78; D5=77). Bees were  
128 reared in two cohorts, grafted on 30/9/2019 and 20/10/2019. Royal jelly nutritional values  
129 (supplementary data) were obtained by the supplier (The Raw Honey Shop, Brighton) using the  
130 international standard for royal jelly (ISO 12824:2016). From these values we calculated the proportion  
131 and ratio of protein:carbohydrate (P:C) in each of the five diets (Table 1).

### 132 *Measuring resting metabolic rates*

133 To determine how larval diet affects adult metabolism, the RMR of adult bees was measured  
134 on the day of emergence (between 14-17 days from the day of grafting) using flow-through  
135 respirometry, with CO<sub>2</sub> production used as a measure of metabolic rate. Emerging adults were first  
136 individually weighed to the nearest mg using a precision balance (Mettler Toledo, UK). Bees were then  
137 restrained using a small cylinder of metal mesh to allow gas exchange, before being placed into a 2 mL  
138 plastic chamber. Air scrubbed of CO<sub>2</sub> and H<sub>2</sub>O was then pumped through the chamber at a consistent

Nicholls, Rossi & Niven 2020

139 rate of 100 mL min<sup>-1</sup> via a mass flow controller (GFC17; Aalborg, NY, USA), before passing through  
140 an infrared CO<sub>2</sub>-H<sub>2</sub>O analyser (Li7000, Li-Cor) which captured data on CO<sub>2</sub> production, relative to an  
141 empty control chamber (Nicholls *et al.*, 2017; Perl and Niven, 2018). The temperature in the room was  
142 held constant at 25°C (± 2°C) and recordings lasted for 20 minutes per bee. The first five minutes of  
143 the recording were treated as a settling period for the bee to adjust to the experimental set up and were  
144 excluded from analysis. During recording the plastic chamber was covered to ensure it was dark, which  
145 reduced bee movement. The order in which bees from different diet treatment groups were measured  
146 was randomised. After recording, bees were frozen to immobilise them, and digital callipers were used  
147 to measure the intertegular span (defined as the distance between the points at which the wings attach  
148 to the thorax) in mm, a proxy measure for body size (Cane, 1987).

149

#### 150 *Data analysis*

151         Respirometry data was analysed using OriginPro software (Origin 2016, OriginLab  
152 Corporation, Northampton, MA, USA). Volumes of CO<sub>2</sub> were baseline corrected and temperature  
153 normalised using the Q10 correction for temperature differences. To calculate the rate of CO<sub>2</sub>  
154 production per bee, the volume of CO<sub>2</sub> (ppm) was converted to CO<sub>2</sub> fraction and multiplied by the flow  
155 rate (100 mL min<sup>-1</sup>). The integral of CO<sub>2</sub> min<sup>-1</sup> *versus* min was calculated for a stable 15-minute period  
156 of the recording, and divided by this time to give a rate of μL CO<sub>2</sub> h<sup>-1</sup>.

157         All statistical analyses were conducted in R 3.6.2 (R Core Team, 2019. [https://www.R-](https://www.R-project.org)  
158 [project.org](https://www.R-project.org)). To examine how diet quality impacts larval survival, Kaplan-Meier survival analysis was  
159 performed using the `survfit` function from the ‘survival’ package. The log-rank test was used to test for  
160 differences in survival between diet treatments with a Bonferroni correction for multiple comparisons.  
161 Linear and mixed effect models were performed by restricted maximum likelihood (REML) estimation  
162 using the `lmer` and `glmer` function from the ‘lme4’ package to test the impact of diet treatment on the  
163 time to adult emergence (days), wet body mass (mg), body size (using intertegular distance as a proxy  
164 measure; mm), body condition (body mass/body size; mg/mm) and CO<sub>2</sub> production (μL CO<sub>2</sub> h<sup>-1</sup>). The  
165 continuous variables body mass, body size, body condition and CO<sub>2</sub> production were log transformed.  
166 Date of grafting was included as a random effect. For all models, Diet 2 was used as the reference  
167 category because bees in this treatment had the best survival. Significances of the fixed effects were  
168 determined using Satterthwaite’s method for estimation of degrees of freedom by using the `anova`  
169 function from ‘lmerTest’. Estimated marginal means (emm) and pairwise comparisons were obtained  
170 using the ‘lsmeans’ package and the *p*-value adjusted with the Tukey method. To test for differences in  
171 variance, we used the Brown-Forsythe test for non-normal data. All plots were made using the ‘ggplot2’  
172 package.

173

174 **3. Results**

175 *The ratio of P:C in larval diets affects honeybee development and survival*

176 Diet had a significant effect on the survival of honeybees to adult emergence (Fig. 1, Table  
177 S1,2; Kaplan-Meier log-rank test,  $\chi^2_4 = 54.7$ ,  $p < 0.001$ ). Larvae reared on the high carbohydrate diet  
178 (D2), which had a P:C ratio of 1:3, had the best survival (70%), significantly higher than all other  
179 treatment groups (Fig. 1, Table S2; Log-rank test D2-D1  $p=0.023$ ; D2-D3  $p < 0.001$ ; D2-D4  $p < 0.001$ ;  
180 D2-D5  $p=0.013$ ). Bees reared on the high protein diet (D4, P:C 1:1.9) had very poor survival (22%),  
181 and only one bee reared on the low carbohydrate diet (D3, P:C 1:1.5) survived to adulthood (Fig. 1).  
182 Consequently, bees from D3 are excluded from subsequent analyses. Bees reared on the diet  
183 recommended by Schmehl *et al.* (2016) for rearing larvae (D1, P:C 1:2.3), and the low protein diet (D5,  
184 P:C 1:2.9) had similar levels of survival (Table S1,2), with just under half of all larvae reaching  
185 adulthood (~45%, Fig. 1). Diet also had a significant effect on development time (days to emergence)  
186 (Table 2, Table S3;  $\chi^2_3 = 22.14$ ,  $p < 0.001$ ), with bees reared on the high carbohydrate diet that  
187 maximised survival (D2) taking significantly longer to emerge (emm  $\pm$  s.e. =  $16.0 \pm 0.96$  days) than  
188 those in all other treatment groups (D1 =  $15.5 \pm 0.96$ ; D4 =  $15.3 \pm 0.97$ ; D5 =  $15.7 \pm 0.96$  days).

189

190 *The ratio of P:C in larval diets affects adult body mass, size and condition*

191 On emergence, bees reared on the high protein diet (D4), the second worst diet for survival,  
192 weighed approximately 10 mg less on average than those reared on all other diets (Fig. 2A), and were  
193 significantly lighter than those reared on the high carbohydrate diet D2 (Table 2, Table S3; estimate  $\pm$   
194 s.e.  $-9.23 \pm 4.32$  mg,  $df = 96.61$ ,  $p = 0.035$ ). Variance in body size also differed between diet treatments  
195 (Fig. 2A). There was a significant difference in the variance of body mass, both between bees reared on  
196 D2 and D1 (Table S4; Brown-Forsythe Test,  $p = 0.007$ ), and D2 and D5 (Brown-Forsythe Test,  $p =$   
197  $0.016$ ) suggesting that the diet maximising survival (D2) allowed for a greater range of body masses.

198 Bees reared on the high protein diet (D4) were also significantly smaller (emm  $\pm$  s.e. =  $2.80 \pm$   
199  $0.09$  mm) than bees in all other treatment groups, as measured by the intertegular span (Fig. 2B; Table  
200 2, Table S3; D1 =  $3.04 \pm 0.08$ , D2 =  $3.04 \pm 0.08$ , D5 =  $2.97 \pm 0.08$  mm). The variance in body size was  
201 also lowest in bees reared on D4, significantly lower than bees reared on D1 (Table S4; Brown-Forsythe  
202 Test  $p = 0.002$ ) or D5 ( $p = 0.026$ ). As expected, there was a significant positive relationship between  
203 body mass and body size (Fig. 2C, Table S5;  $\chi^2_1 = 12.01$ ,  $p < 0.001$ ), but diet treatment had no significant  
204 effect on the relationship between body mass and body size.

205 Body condition scores (body mass/body size) also differed between diet treatments (Fig. 2D,  
206 Table 2, Table S3;  $F_{3,65} = 3.354$ ,  $p = 0.024$ ). Bees reared on the high carbohydrate diet (D2), had a  
207 significantly lower body condition score on average (emm =  $26.1 \pm 0.80$  mg/mm) than those reared on  
208 D1 (emm =  $29.5 \pm 0.82$  mg/mm; estimate  $\pm$  s.e.  $3.40 \pm 1.14$  mg/mm,  $p = 0.004$ ) or D5 (emm =  $28.8 \pm$   
209  $0.80$  mg/mm; estimate  $\pm$  s.e.  $2.70 \pm 1.13$  mg/mm,  $p = 0.020$ ). As with body mass, there was also a



Nicholls, Rossi & Niven 2020

210 significant difference in the variance of body condition scores between bees raised on D2 and D1 (Table  
211 S4; Brown-Forsythe Test  $p = 0.011$ ) and D2 and D5 (Brown-Forsythe Test  $p = 0.008$ ).

212

### 213 *The ratio of P:C in larval diets affects the scaling of resting metabolic rate with body mass*

214 Across all diet treatments, RMR ( $\mu\text{L CO}_2 \text{h}^{-1}$ ) scaled positively with body mass (Fig. 3A, Table  
215 3), and bees reared on the diet which maximised survival (D2) had a significantly steeper slope  
216 compared to those reared on D1 (Table 4). Diet also had a significant effect on the scaling of mass-  
217 specific RMR (RMR/body mass; Fig. 3B, Table 4). Bees reared on D2, the diet which maximised  
218 survival, showed a positive relationship between body mass and mass-specific RMR, whereas bees  
219 reared on all other diets exhibited a negative relationship (Fig. 3B). The difference in scaling between  
220 body mass and mass-specific RMR in bees reared on D1 and D2 was significant (Table 4; estimate  $\pm$   
221 s.e. =  $-1.00 \pm 0.47$ ,  $df = 92.03$ ,  $p = 0.035$ ). The nature of the scaling relationship between adult body  
222 mass and RMR differed considerably according to larval nutrition, with bees reared on D2 diet  
223 exhibiting positive allometry, bees reared on D5 diet exhibiting isometry and bees reared on D1 diet  
224 exhibiting negative allometry (Table 3). Body size was not a significant predictor of RMR (Fig. 3C;  
225 Table S5;  $F_{1,53.36} = 2.37$ ,  $p = 0.242$ ), and while for most diet treatments there was a positive relationship  
226 between body condition and RMR, again this was not a significant predictor (Fig. 3D, Table S5;  $F_{1,63.72}$   
227 =  $2.67$ ,  $p = 0.107$ ).

228

## 229 **Discussion**

230 Many organisms experience nutritionally sub-optimal diets during development, but very few  
231 studies have directly examined the impact of developmental diet quality on adult metabolism,  
232 particularly in insects. This question is of particular importance for bees, which as adult foragers face  
233 extremely high energetic demands, and as larvae experience a diet completely dependent on the  
234 provisioning choices of their mother and/or siblings, likely limiting their ability to self-regulate the  
235 intake of particular nutrients. Previous studies have shown that manipulating colony access to pollen  
236 results in reduced body size and life span in adult bees (Eishchen, Rothenbuhler and Kulinčević, 1982;  
237 Daly *et al.*, 1995; Brodschneider and Crailsheim, 2010). Because the exact nutritional content of larval  
238 diets is manipulated at the colony level through the brood tending behaviour of nurse bees, larval  
239 nutrition is unknown in such studies. By using *in vitro* rearing methods, we were able to tightly control  
240 the macro-nutrient content of larval honeybee diets, demonstrating that the protein and carbohydrate  
241 content of the honeybee larval diet has a significant impact on larval development time, survival to  
242 adulthood, and adult body mass, size and condition. Using flow-through respirometry to measure  
243 whole-organism metabolism, we have shown for the first time that the protein and carbohydrate content  
244 of the larval diet of a holometabolous insect can impact the scaling relationship between adult body  
245 mass and RMR.



246 Larvae reared on a high carbohydrate diet had the highest survival to adulthood (D2, P:C 1:3),  
247 significantly higher than bees in all other treatment groups. Nearly all bees reared on the low  
248 carbohydrate diet failed to eclose (D3, P:C 1:1.5), and bees reared on the high protein diet (D4, P:C  
249 1:1.9) also showed poor survival to adulthood. However, the absolute *amount* of protein and  
250 carbohydrate consumed over the course of development appears to be more important for survival than  
251 the ratio of macronutrients contained within the diet; though the low protein diet (D5, P:C 1:2.9) had a  
252 similar ratio of protein to carbohydrate as the high carbohydrate diet (D2), survival was significantly  
253 worse. Helm *et al.* (2017) also observed the highest survival in bees reared on a medium protein and  
254 high carbohydrate diet, and poor survival for bees reared on high protein diets, though survival was  
255 only recorded to the pupal stage. They concluded that there was an interaction between protein and  
256 carbohydrate on larval development, fitting with the idea of both the ratio and absolute amounts of  
257 protein and carbohydrate being important. Across all treatment groups, we observed most deaths  
258 occurring between pupation and adult eclosion, emphasising the importance of assessing survival to the  
259 adulthood. Pupation is a highly metabolically active period (Roeder and Behmer, 2014), suggesting that  
260 the impact of diet quality on the nutrient reserves available during this period may be the key to survival  
261 to adulthood.

262 The impact of high levels of dietary protein, both the absolute amount and relative content,  
263 upon survival has been demonstrated for bees as well as many other organisms (Lee *et al.*, 2008;  
264 Dussutour and Simpson, 2009, 2012; Cook and Behmer, 2010; Pirk *et al.*, 2010; Le Couteur *et al.*, 2015;  
265 Solon-Biet *et al.*, 2015). For example, the survival to adulthood, larval development, and size of solitary  
266 Megachilid bees is best on a high carbohydrate diet (Austin and Gilbert, 2018). The absolute quantity  
267 rather than the ratio of dietary macronutrients has also been shown to impact survival in soldier flies  
268 (Barragan-Fonseca *et al.*, 2019). However, the mechanism underpinning the deleterious effect of  
269 consuming large volumes of protein on lifespan is poorly understood. It may be that digestion of large  
270 amounts of protein is very energetically costly (Westerterp, Wilson and Rolland, 1999; Halton and Hu,  
271 2004), and produces toxic levels of nitrogen waste (Wright, 1995), though a recent study in adult ants  
272 has shown that even feeding free amino acids that require little digestion leads to a reduction in life  
273 span, leading the authors to suggest that excess amino acids may lead to an over-stimulation of the  
274 nutrient pathways that regulate lifespan (Arganda *et al.*, 2017). Certain amino acids are seemingly more  
275 toxic than others, notably methionine, serine, threonine and phenylalanine, suggesting that the precise  
276 amino acid composition of an organisms' diet may be important for survival and longevity.

277 Bees reared on the high carbohydrate diet, the best for survival, also took significantly longer  
278 to emerge as adults compared to bees in all other diet groups. This contrasts with previous studies in  
279 insects which have typically observed slower development on *lower* quality diets (Johnson, Wofford  
280 and Whitehand, 1992; Angell *et al.*, 2020). For example, Rodrigues *et al.* (2015) found that when  
281 *Drosophila* larvae are given the choice between a diet that maximises survival, body size and fecundity,  
282 *versus* a diet that maximises development rate, they preferentially feed on the latter, potentially as a

283 strategy to both avoid predation and maximise mating opportunities. Honeybees workers, in contrast,  
284 have a rather unique life history, developing inside a well-defended colony with much less risk of  
285 predation compared to other insects. Workers do not need to mate and reproduce, and there is little  
286 competition between individuals for resources which are provided for them by foragers and nurses.  
287 These factors may therefore reduce the pressure on honeybee larvae to develop quickly, particularly  
288 considering that rapid development is often thought to lead to earlier or faster senescence (Monaghan,  
289 Metcalfe and Torres, 2009). It remains to be determined how dietary macronutrients affect the  
290 development rates of the reproductive castes, queens and drones, that may face different pressures on  
291 developmental speed.

292 Diet also had a significant effect on emerging adult bees' body mass, size and condition, which  
293 fits with previous studies linking the quality of pollen and nectar in larval diets to emergent adult bee  
294 size (Roulston and Cane, 2002; Burkle and Irwin, 2009). To our knowledge, however, this is the first  
295 study to demonstrate experimentally that the specific macro-nutrient composition of the larval diet  
296 affects body mass, size and condition in worker honeybees, which are typically considered to exhibit  
297 limited variation in body size compared to other bee species such as bumblebees (Goulson *et al.*, 2002)  
298 or solitary bees. Perhaps unsurprisingly, bees reared on the worst diet for survival, the high protein diet,  
299 were the smallest and lightest on emergence. However, bees reared on this poor diet also had the  
300 narrowest range of body sizes, while those reared on the high carbohydrate diet had the best survival  
301 rate and the widest variation in body mass, suggesting that diets that increase survival also allow for a  
302 greater range of body sizes to emerge. Bees reared on the high carbohydrate diet had significantly lower  
303 body condition scores than bees reared on the diet containing a moderate amount of protein and  
304 carbohydrate. Diet-dependent variation in worker body size can have implications for both individual  
305 and colony functioning. Kerr & Hebling (1964) found that worker weight can affect the age with which  
306 worker honeybees make the transition from in-hive tasks to foraging, and in bumblebees and other bees,  
307 body size has been shown to correlate positively with foraging range (Greenleaf *et al.*, 2007) and the  
308 weight of pollen and nectar loads that can be collected and transported back to the nest (Ramalho,  
309 Imperatriz-Fonseca and Giannini, 1998; Goulson *et al.*, 2002; Kerr, Crone and Williams, 2019). Smaller  
310 bees have also been shown to be less effective at pollinating flowers (Jauker *et al.*, 2012; Willmer and  
311 Finlayson, 2014). Thus, consuming inadequate amounts of macronutrients during development leads to  
312 both lower survival and body mass in adult worker bees, with potential consequences for the age  
313 structure and foraging efficiency of the colony, as well as wider ecological implications for the delivery  
314 of pollination.

315 Studies examining the impact of developmental diet on adult metabolism and metabolic scaling  
316 are rare, particularly in insects, and it is generally not agreed whether poor quality diets should lead to  
317 an increase or decrease in the RMR of emerging adults, given that this is likely to depend on the specific  
318 behavioural and/or physiological response(s) of an organism to an unbalanced diet (Burton *et al.*, 2011).  
319 For example, organisms might be expected to reduce their metabolic rates in response to a low quality

320 diet to minimise energetic expenditure (McNab, 1986). However, physiological adaptations to  
321 imbalanced diets, such as increasing gut length, may be metabolically costly (Yang and Joern, 1994).  
322 The few studies that have examined the impact of manipulating diet nutritional quality have generally  
323 found that nutritionally poor diets result in an elevation of the average RMR (14,33–35, but see 76).  
324 Typically these studies have considered only the short term impacts of diet on metabolism, during either  
325 adulthood or a single juvenile stage, and often do not report the impact of diet quality on the scaling of  
326 RMR with body mass or size. Here we demonstrated that body mass scales positively with RMR across  
327 all treatment groups, as is typical for insects (Niven and Scharlemann, 2005), and that larval diet has a  
328 long-term impact on metabolic scaling in adult bees. However, there were substantial differences in the  
329 slope of the scaling relationship between body mass and RMR depending on diet. Bees reared on the  
330 high carbohydrate diet (D2) showed positive allometry, with larger bees exhibiting higher RMR, which  
331 is very unusual [6-13]. In comparison, the RMR of bees reared on a diet containing a moderate amount  
332 of protein and carbohydrate (D1) showed isometry, whilst that of bees reared on the low protein diet  
333 (D5) exhibited a decelerating allometric relationship. Bees reared on the high carbohydrate diet (D2)  
334 also exhibited an unusual increase in mass-specific RMR with body mass, while bees reared on all other  
335 diets displayed a more typical decelerating or isometric relationship between mass-specific RMR and  
336 body mass. Neither body size (intertegular span) nor body condition scaled with RMR. This discrepancy  
337 with the finding for body mass is somewhat unexpected, given that we recorded RMR immediately  
338 following emergence, before additional feeding could strongly influence the bees' mass. This is an  
339 important finding given that body size is often used as a proxy for body mass but may in fact scale quite  
340 differently with RMR. In contrast to our finding that diet quality affects the scaling of body mass and  
341 RMR, Karowe & Martin (1989) observed that while consumption of lower quality diets by larvae of  
342 the moth *Spodoptera eridania* led to an elevated RMR, the slopes of the positive scaling relationships  
343 between RMR and body mass were unaffected by diet treatment. However, in this study only protein  
344 quality was manipulated. Also metabolic rates were measured during the larval stage only, and in other  
345 organisms scaling relationships have been shown to change during ontogeny and could therefore be  
346 differentially affected by diet (Killen *et al.*, 2007; Frappell, 2008). Consuming algal diets with  
347 unbalanced phosphorous:carbon ratios has been shown to change the scaling relationship between RMR  
348 and body mass in *Daphnia*, though this finding was based on a pooled data set across four closely  
349 related species (Jeyasingh, 2007). Therefore, our study is the first to demonstrate that the precise nature  
350 of an allometric scaling relationship can be altered by developmental diet within a single invertebrate  
351 species, significantly contributing to our understanding of the mechanistic basis of variation in the  
352 allometry of RMR (Vaca and White, 2010).

353         The use of CO<sub>2</sub> production as a measure of RMR in the current study means that we were not  
354 able to detect changes in respiratory quotient arising from potential shifts in the substrate used for  
355 metabolism. For example, Clark *et al.* (2016) concluded that the lack of difference in RMR between  
356 winged and flightless morphs of the cricket *Gryllus firmus*, was due to a shift in metabolic substrate

Nicholls, Rossi & Niven 2020

357 from carbohydrate to protein across diet treatments. Though we are unable to rule out this possibility,  
358 if such a shift has also occurred in the adult bees measured in our study, given that we tested bees on  
359 the day of emergence, prior to feeding, this would then suggest that substantial shifts in metabolic  
360 substrate use can also occur in response to differences in larval nutrition.

361 Here we considered only differences in protein and carbohydrate content of the diets, given the  
362 number of studies demonstrating that insect herbivores tightly control their intake of these two nutrients  
363 (Behmer, 2009). Royal jelly also contains around 5% lipids, on average, which are increasingly being  
364 recognised as an important component of larval nutrition, with bees appearing to regulate their intake  
365 of fats at both the level of the colony and individual foragers (Vaudo *et al.*, 2016a; Vaudo *et al.*, 2016b;  
366 Vaudo *et al.*, 2020). Therefore, variation in the lipid content of the larval diet may also have had an  
367 impact on adult metabolism. Royal jelly also contains various micronutrients such as vitamins and  
368 sterols, which are important for hormone production and cannot be synthesised by bees themselves  
369 (Wright, Nicolson and Shafir, 2018). In one of the few other studies examining the impact of  
370 developmental diet on adult insect metabolism, Hill *et al.* (2020) observed changes in average RMR in  
371 stick insects reared from birth on leaves of three different plant species. Any effects on metabolic scaling  
372 were not reported. The macro-nutrient content of leaves from the three plant species did not show much  
373 variation, but the concentration and digestibility of micronutrients did. This suggests that in future  
374 studies, additional nutritional components other than the macro-nutrients protein and carbohydrate  
375 should also be considered in the context of dietary impacts on metabolism.

376

## 377 **Conclusions**

378 There is increasing evidence that habitat fragmentation and farming intensification are reducing  
379 both the quantity and diversity of floral resources available for bees and other pollinators (Donkersley  
380 *et al.*, 2017; Trinkl *et al.*, 2020), which is of considerable concern given the global importance of insect  
381 pollination to ecosystem functioning and food security. Here we clearly demonstrate that the nutritional  
382 quality of larval diets impacts the metabolic functioning of adult worker bees, with diets more optimal  
383 for survival resulting in a higher metabolic rate per unit of body mass. As foraging bees already  
384 experience extremely high metabolic demands, differences in the quality of larval nutrition could impact  
385 the metabolic function which may negatively influence the foraging efficiency of workers.  
386 Subsequently this could impact on the build-up of pollen and nectar stores available for brood rearing  
387 and overwintering, with consequences for overall colony success.

388

## 389 **Acknowledgements**

390 We thank Francis Ratnieks and Luciano Scandian for providing access to honeybee colonies and  
391 frames of larvae.

392 **Author Contributions**

393 EN conceived the study, designed the methods, performed statistical analysis and wrote the paper.  
394 MR collected data in the laboratory, performed statistical analysis and commented on the paper. JN  
395 conceived the study and commented on the paper.

396 **Competing Interests**

397 All authors declare no competing interests.

398 **Funding**

399 This research was made possible via a grant awarded to EN and JEN from the C. B. Dennis Trust.

400 **References**

401 Anderson, J. F. (1993) 'Respiratory energetics of two Florida harvestmen', *Comparative Biochemistry*  
402 *and Physiology -- Part A: Physiology*, 105(1), pp. 67–72. doi: 10.1016/0300-9629(93)90174-3.

403 Angell, C. S. *et al.* (2020) 'Development time mediates the effect of larval diet on ageing and mating  
404 success of male antler flies in the wild', *Proceedings of the Royal Society B*, 287(1938), p. 20201876.  
405 doi: 10.1098/rspb.2020.1876.

406 Arganda, S. *et al.* (2017) 'Parsing the life-shortening effects of dietary protein: Effects of individual  
407 amino acids', *Proceedings of the Royal Society B: Biological Sciences*, 284(1846), p. 20162052. doi:  
408 10.1098/rspb.2016.2052.

409 Austin, A. J. and Gilbert, J. D. J. (2018) 'The geometry of dependence: Solitary bee larvae prioritize  
410 carbohydrate over protein in parentally provided pollen', *bioRxiv*, p. 397802. doi: 10.1101/397802.

411 Ayayee, P. A. *et al.* (2018) 'The role of gut microbiota in the regulation of standard metabolic rate in  
412 female *Periplaneta americana*', *PeerJ*, 6, p. e4717. doi: 10.7717/peerj.4717.

413 Ayayee, P. A. *et al.* (2020) 'Role of the gut microbiome in mediating standard metabolic rate after  
414 dietary shifts in the viviparous cockroach, *Diploptera punctata* ', *Journal of Experimental Biology*,  
415 11. doi: 10.1242/jeb.218271.

416 Barragan-Fonseca, K. B. *et al.* (2019) 'Effects of dietary protein and carbohydrate on life-history  
417 traits and body protein and fat contents of the black soldier fly *Hermetia illucens*', *Physiological*  
418 *Entomology*, 44(2), pp. 148–159. doi: 10.1111/phen.12285.

419 Bartholomew, G. A., Lighton, J. R. B. and Feener, D. H. (1988) 'Energetics of trail running, load  
420 carriage, and emigration in the column-raiding army ant *Eciton hamatum*', *Physiological Zoology*,  
421 61(1), pp. 57–68. doi: 10.1086/physzool.61.1.30163737.

Nicholls, Rossi & Niven 2020

- 422 Behmer, S. T. (2009) ‘Insect herbivore nutrient regulation’, *Annual Review of Entomology*, 54(1), pp.  
423 165–187. doi: 10.1146/annurev.ento.54.110807.090537.
- 424 Brodschneider, R. and Crailsheim, K. (2010) ‘Nutrition and health in honey bees’, *Apidologie*, 41(3),  
425 pp. 278–294.
- 426 Brown, J. H. *et al.* (2004) ‘Toward a metabolic theory of ecology’, *Ecology*, 85(7), pp. 1771–1789.  
427 doi: 10.1890/03-9000.
- 428 Burkle, L. and Irwin, R. (2009) ‘Nectar sugar limits larval growth of solitary bees (Hymenoptera:  
429 Megachilidae)’, *Environmental Entomology*, 38(4), pp. 1293–1300. doi: 10.1603/022.038.0441.
- 430 Burton, T *et al.* (2011) ‘What causes intraspecific variation in resting metabolic rate and what are its  
431 ecological consequences?’, *Proceedings of the Royal Society B*, 278, pp. 3465–3473. doi:  
432 10.1098/rspb.2011.1778.
- 433 Burton, T. *et al.* (2011) ‘What causes intraspecific variation in resting metabolic rate and what are its  
434 ecological consequences?’, *Proceedings of the Royal Society B: Biological Sciences*, 278(1724), pp.  
435 3465–3473. doi: 10.1098/rspb.2011.1778.
- 436 Cane, J. H. (1987) ‘Estimation of bee size using intertegular span (Apoidea)’, *Journal of the Kansas  
437 Entomological Society*, 60, pp. 145–147.
- 438 Chown, S. L. *et al.* (2007) ‘Scaling of insect metabolic rate is inconsistent with the nutrient supply  
439 network model’, *Functional Ecology*, 21(2), pp. 282–290. doi: 10.1111/j.1365-2435.2007.01245.x.
- 440 Clark, R. M., Zera, A. J. and Behmer, S. T. (2016) ‘Metabolic rate is canalized in the face of variable  
441 life history and nutritional environment’, *Functional Ecology*, 30(6), pp. 922–931. doi: 10.1111/1365-  
442 2435.12574.
- 443 Cook, S. C. and Behmer, S. T. (2010) ‘Macronutrient regulation in the tropical terrestrial ant  
444 *Ectatomma ruidum* (Formicidae): A field study in costa rica’, *Biotropica*, 42(2), pp. 135–139. doi:  
445 10.1111/j.1744-7429.2009.00616.x.
- 446 Corby-Harris, V. *et al.* (2018) ‘Honey bee (*Apis mellifera*) nurses do not consume pollens based on  
447 their nutritional quality’, *PLoS ONE*, 13(1), p. e0191050. doi: 10.1371/journal.pone.0191050.
- 448 Le Couteur, D. G. *et al.* (2015) ‘The influence of macronutrients on splanchnic and hepatic  
449 lymphocytes in aging mice’, *Journals of Gerontology - Series A Biological Sciences and Medical  
450 Sciences*, 70(12), pp. 1499–1507. doi: 10.1093/gerona/glu196.
- 451 Daly, H. V. *et al.* (1995) ‘Honey bee morphometrics: Linearity of variables with respect to body size  
452 and classification tested with European worker bees reared by varying ratios of nurse bees’, *Journal  
453 of Apicultural Research*, 34(3), pp. 129–145. doi: 10.1080/00218839.1995.11100898.



Nicholls, Rossi & Niven 2020

- 454 Desai, M. and Hales, C. N. (1997) 'Role of fetal and infant growth in programming metabolism in  
455 later life', *Biological Reviews*, 72(2), pp. 329–348. doi: 10.1111/j.1469-185X.1997.tb00016.x.
- 456 Donkersley, P. *et al.* (2017) 'Nutritional composition of honey bee food stores vary with floral  
457 composition', *Oecologia*, 185(4), pp. 749–761. doi: 10.1007/s00442-017-3968-3.
- 458 Dussutour, A. and Simpson, S. J. (2009) 'Communal nutrition in ants', *Current Biology*, 19(9), pp.  
459 740–744. doi: 10.1016/j.cub.2009.03.015.
- 460 Dussutour, A. and Simpson, S. J. (2012) 'Ant workers die young and colonies collapse when fed a  
461 high-protein diet', *Proceedings of the Royal Society B: Biological Sciences*, 279(1737), pp. 2402–  
462 2408. doi: 10.1098/rspb.2012.0051.
- 463 Eishchen, F. A., Rothenbuhler, W. C. and Kulinčević, J. M. (1982) 'Length of life and dry weight of  
464 worker honeybees reared in colonies with different worker-larva ratios', *Journal of Apicultural  
465 Research*, 21(1), pp. 19–25. doi: 10.1080/00218839.1982.11100511.
- 466 Felton, G. W. (1996) 'Nutritive quality of plant protein: Sources of variation and insect herbivore  
467 responses', *Archives of Insect Biochemistry and Physiology*, 32(1), pp. 107–130. doi:  
468 [https://doi.org/10.1002/\(SICI\)1520-6327\(1996\)32:1<107::AID-ARCH7>3.0.CO;2-X](https://doi.org/10.1002/(SICI)1520-6327(1996)32:1<107::AID-ARCH7>3.0.CO;2-X).
- 469 Ferioli, F., Armaforte, E. and Caboni, M. F. (2014) 'Comparison of the lipid content, fatty acid profile  
470 and sterol composition in local Italian and commercial royal jelly samples', *Journal of the American  
471 Oil Chemists' Society*, 91(6), pp. 875–884. doi: 10.1007/s11746-014-2446-x.
- 472 Frappell, P. B. (2008) 'Ontogeny and allometry of metabolic rate and ventilation in the marsupial:  
473 Matching supply and demand from ectothermy to endothermy', *Comparative Biochemistry and  
474 Physiology - A Molecular and Integrative Physiology*, 150(2), pp. 181–188. doi:  
475 10.1016/j.cbpa.2008.02.017.
- 476 Garcia-Amoedo, L. H. and De Almeida-Muradian, L. B. (2007) 'Physicochemical composition of  
477 pure and adulterated royal jelly', *Quimica Nova*, 30(2), pp. 257–259. doi: 10.1590/S0100-  
478 40422007000200002.
- 479 Gillooly, J. F. *et al.* (2001) 'Effects of size and temperature on metabolic rate', *Science*, 293(5538),  
480 pp. 2248–2251. doi: 10.1126/science.1061967.
- 481 Glazier, D. S. (2005) 'Beyond the "3/4-power law": Variation in the intra- and interspecific scaling of  
482 metabolic rate in animals', *Biological Reviews*, 80(4), pp. 611–662. doi:  
483 10.1017/S1464793105006834.
- 484 Goulson, D. *et al.* (2002) 'Can alloethism in workers of the bumblebee, *Bombus terrestris*, be  
485 explained in terms of foraging efficiency?', *Animal Behaviour*, 64(1), pp. 123–130. doi:

Nicholls, Rossi & Niven 2020

- 486 10.1006/anbe.2002.3041.
- 487 Greenleaf, S. S. *et al.* (2007) ‘Bee foraging ranges and their relationship to body size’, *Oecologia*,  
488 153(3), pp. 589–596. doi: 10.1007/s00442-007-0752-9.
- 489 Hales, C. N. and Barker, D. J. P. (2001) ‘The thrifty phenotype hypothesis: Type 2 diabetes’, *British*  
490 *Medical Bulletin*, 60(1), pp. 5–20. doi: 10.1093/bmb/60.1.5.
- 491 Halton, T. L. and Hu, F. B. (2004) ‘The effects of high protein diets on thermogenesis, satiety and  
492 weight loss: A critical review’, *Journal of the American College of Nutrition*, 23(5), pp. 373–385. doi:  
493 10.1080/07315724.2004.10719381.
- 494 Helm, B. R. *et al.* (2017) ‘The geometric framework for nutrition reveals interactions between protein  
495 and carbohydrate during larval growth in honey bees’, *Biology Open*, 6(6), pp. 872–880. doi:  
496 10.1242/bio.022582.
- 497 Hill, S. J., Silcocks, S. C. and Andrew, N. R. (2020) ‘Impacts of temperature on metabolic rates of  
498 adult *Extatosoma tiaratum* reared on different host plant species’, *Physiological Entomology*, 45(1),  
499 pp. 7–15. doi: 10.1111/phen.12310.
- 500 Howe, S. R. *et al.* (1985) ‘Composition of freshly harvested and commercial royal jelly’, *Journal of*  
501 *Apicultural Research*, 24(1), pp. 52–61. doi: 10.1080/00218839.1985.11100649.
- 502 Jauker, F. *et al.* (2012) ‘Early reproductive benefits of mass-flowering crops to the solitary bee *Osmia*  
503 *rufa* outbalance post-flowering disadvantages’, *Basic and Applied Ecology*, 13, pp. 268–276. doi:  
504 10.1016/j.baae.2012.03.010.
- 505 Jeyasingh, P. D. (2007) ‘Plasticity in metabolic allometry: The role of dietary stoichiometry’, *Ecology*  
506 *Letters*, 10(4), pp. 282–289. doi: 10.1111/j.1461-0248.2007.01023.x.
- 507 Joern, A., Provin, T. and Behmer, S. T. (2012) ‘Not just the usual suspects: Insect herbivore  
508 populations and communities are associated with multiple plant nutrients’, *Ecology*, 93(5), pp. 1002–  
509 1015. doi: 10.1890/11-1142.1.
- 510 Johnson, J. A., Wofford, P. L. and Whitehand, L. C. (1992) ‘Effect of diet and temperature on  
511 development rates, survival, and reproduction of the Indian meal moth (Lepidoptera: Pyralidae)’,  
512 *Journal of Economic Entomology*, 85(2), pp. 561–566. doi: 10.1093/jee/85.2.561.
- 513 Karasov, W. H., Martínez Del Rio, C. and Caviedes-Vidal, E. (2011) ‘Ecological physiology of diet  
514 and digestive systems’, *Annual Review of Physiology*, 73, pp. 69–93. doi: 10.1146/annurev-physiol-  
515 012110-142152.
- 516 Karowe, D. N. and Martin, M. M. (1989) ‘The effects of quantity and quality of diet nitrogen on the  
517 growth, efficiency of food utilization, nitrogen budget, and metabolic rate of fifth-instar *Spodoptera*

Nicholls, Rossi & Niven 2020

- 518 *eridania* larvae (Lepidoptera: Noctuidae)', *Journal of Insect Physiology*, 35(9), pp. 699–708. doi:  
519 10.1016/0022-1910(89)90089-9.
- 520 Kerr, N. Z., Crone, E. E. and Williams, N. M. (2019) 'Integrating vital rates explains optimal worker  
521 size for resource return by bumblebee workers', *Functional Ecology*, 33(3), pp. 467–478. doi:  
522 10.1111/1365-2435.13251.
- 523 Kerr, W. E. and Hebling, N. J. (1964) 'Influence of the weight of worker bees on division of labor',  
524 *Evolution*, 1, pp. 267–270. doi: 10.2307/2406400.
- 525 Killen, S. S. *et al.* (2007) 'Little left in the tank: Metabolic scaling in marine teleosts and its  
526 implications for aerobic scope', *Proceedings of the Royal Society B: Biological Sciences*, 274(1608),  
527 pp. 431–438. doi: 10.1098/rspb.2006.3741.
- 528 Lee, K. P. *et al.* (2008) 'Lifespan and reproduction in *Drosophila*: New insights from nutritional  
529 geometry', *Proceedings of the National Academy of Sciences*, 105(7), pp. 2498–2503. doi:  
530 10.1073/pnas.0710787105.
- 531 McCarthy, I. D. (2000) 'Temporal repeatability of relative standard metabolic rate in juvenile Atlantic  
532 salmon and its relation to life history variation', *Journal of Fish Biology*, 57(1), pp. 224–238. doi:  
533 10.1006/jfbi.2000.1313.
- 534 McNab, B. K. (1986) 'The influence of food habits on the energetics of eutherian mammals',  
535 *Ecological Monographs*, 56(1), pp. 1–19. doi: 10.2307/2937268.
- 536 McNab, B. K. (1988) 'Complications inherent in scaling the basal rate of metabolism in mammals',  
537 *Quarterly Review of Biology*, 63(1), pp. 25–54. doi: 10.1086/415715.
- 538 Moe, B. *et al.* (2004) 'Developmental plasticity of physiology and morphology in diet-restricted  
539 European shag nestlings (*Phalacrocorax aristotelis*)', *Journal of Experimental Biology*, 207(23), pp.  
540 4067–4076. doi: 10.1242/jeb.01226.
- 541 Monaghan, P., Metcalfe, N. B. and Torres, R. (2009) 'Oxidative stress as a mediator of life history  
542 trade-offs: Mechanisms, measurements and interpretation', *Ecology Letters*, 12(1), pp. 75–92. doi:  
543 10.1111/j.1461-0248.2008.01258.x.
- 544 Morgan, K. R., Shelly, T. E. and Kimsey, L. S. (1985) 'Body temperature regulation, energy  
545 metabolism, and foraging in light-seeking and shade-seeking robber flies', *Journal of Comparative*  
546 *Physiology B*, 155(5), pp. 561–570. doi: 10.1007/BF00694445.
- 547 Naug, D. (2009) 'Nutritional stress due to habitat loss may explain recent honeybee colony collapses',  
548 *Biological Conservation*, 142(10), pp. 2369–2372. doi: 10.1016/j.biocon.2009.04.007.
- 549 Naya, D. E., Lardies, M. A. and Bozinovic, F. (2007) 'The effect of diet quality on physiological and

Nicholls, Rossi & Niven 2020

- 550 life-history traits in the harvestman *Pachylus paessleri*', *Journal of Insect Physiology*, 53(2), pp. 132–  
551 138. doi: 10.1016/j.jinsphys.2006.11.004.
- 552 Nespolo, R. F., Castañeda, L. E. and Roff, D. A. (2005) 'The effect of fasting on activity and resting  
553 metabolism in the sand cricket, *Gryllus firmus*: A multivariate approach', *Journal of Insect*  
554 *Physiology*, 51(1), pp. 61–66. doi: 10.1016/j.jinsphys.2004.11.005.
- 555 Nicholls, E. *et al.* (2017) 'Larval exposure to field-realistic concentrations of clothianidin has no  
556 effect on development rate, over-winter survival or adult metabolic rate in a solitary bee, *Osmia*  
557 *bicornis*', *PeerJ*. doi: 10.7717/peerj.3417.
- 558 Niven, J. E. and Scharlemann, J. P. W. (2005) 'Do insect metabolic rates at rest and during flight scale  
559 with body mass?', *Biology Letters*, 1(3), pp. 346–349. doi: 10.1098/rsbl.2005.0311.
- 560 Nussear, K. E. *et al.* (1998) 'Diet quality does not affect resting metabolic rate or body temperatures  
561 selected by an herbivorous lizard', *Journal of Comparative Physiology - B Biochemical, Systemic,*  
562 *and Environmental Physiology*, 168(3), pp. 183–189. doi: 10.1007/s003600050135.
- 563 Perl, C. D. and Niven, J. E. (2018) 'Metabolic rate scaling, ventilation patterns and respiratory water  
564 loss in red wood ants: Activity drives ventilation changes, metabolic rate drives water loss', *Journal*  
565 *of Experimental Biology*, 221, p. jeb182501. doi: 10.1242/jeb.182501.
- 566 Pettersen, A. K., Marshall, D. J. and White, C. R. (2018) 'Understanding variation in metabolic rate',  
567 *Journal of Experimental Biology*, 221, p. jeb166876. doi: 10.1242/jeb.166876.
- 568 Pirk, C. W. W. *et al.* (2010) 'The importance of protein type and protein to carbohydrate ratio for  
569 survival and ovarian activation of caged honeybees (*Apis mellifera scutellata*)', *Apidologie*, 41(1), pp.  
570 62–72. doi: 10.1051/apido/2009055.
- 571 Ramalho, M., Imperatriz-Fonseca, V. L. and Giannini, T. C. (1998) 'Within-colony size variation of  
572 foragers and pollen load capacity in the stingless bee *Melipona quadrifasciata anthidioides* Lepeletier  
573 (Apidae, Hymenoptera)', *Apidologie*, 29(3), pp. 221–228. doi: 10.1051/apido:19980302.
- 574 Roark, A. M. and Bjorndal, K. A. (2009) 'Metabolic rate depression is induced by caloric restriction  
575 and correlates with rate of development and lifespan in a parthenogenetic insect', *Experimental*  
576 *Gerontology*, 44(6), pp. 413–419. doi: 10.1016/j.exger.2009.03.004.
- 577 Roces, F. and Lighton, J. R. B. (1995) 'Larger bites of leaf-cutting ants', *Nature*, 373(6513), pp. 392–  
578 392. doi: 10.1038/373392a0.
- 579 Rodrigues, M. A. *et al.* (2015) '*Drosophila melanogaster* larvae make nutritional choices that  
580 minimize developmental time', *Journal of Insect Physiology*, 81, pp. 69–80. doi:  
581 10.1016/j.jinsphys.2015.07.002.

Nicholls, Rossi & Niven 2020

- 582 Roeder, K. A. and Behmer, S. T. (2014) ‘Lifetime consequences of food protein-carbohydrate content  
583 for an insect herbivore’, *Functional Ecology*, 28(5), pp. 1135–1143. doi: 10.1111/1365-2435.12262.
- 584 Roulston, T. H. and Cane, J. H. (2002) ‘The effect of pollen protein concentration on body size in the  
585 sweat bee *Lasioglossum zephyrum* (Hymenoptera: Apiformes)’, *Evolutionary Ecology*, 16(1), pp.  
586 49–65. doi: 10.1023/A:1016048526475.
- 587 Savage, V. M. *et al.* (2004) ‘The predominance of quarter-power scaling in biology’, *Functional*  
588 *Ecology*, 18(2), pp. 257–282. doi: 10.1111/j.0269-8463.2004.00856.x.
- 589 Schmehl, D. R. *et al.* (2016) ‘Protocol for the *in vitro* rearing of honey bee (*Apis mellifera* L.)  
590 workers’, *Journal of Apicultural Research*, 55(2), pp. 113–129. doi:  
591 10.1080/00218839.2016.1203530.
- 592 Simpson, S. J. and Raubenheimer, D. (2012) *The nature of nutrition: A unifying framework from*  
593 *animal adaptation to human obesity*, *The Nature of Nutrition: A Unifying Framework from Animal*  
594 *Adaptation to Human Obesity*. Princeton University Press. doi: 10.5860/choice.50-2662.
- 595 Solon-Biet, S. M. *et al.* (2015) ‘Macronutrient balance, reproductive function, and lifespan in aging  
596 mice’, *Proceedings of the National Academy of Sciences*, 112(11), pp. 3481–3486. doi:  
597 10.1073/pnas.1422041112.
- 598 Speakman, J. R. (2005) ‘Body size, energy metabolism and lifespan’, *Journal of Experimental*  
599 *Biology*, 208(9), pp. 1717–1730. doi: 10.1242/jeb.01556.
- 600 Trinkl, M. *et al.* (2020) ‘Floral species richness correlates with changes in the nutritional quality of  
601 larval diets in a stingless bee’, *Insects*, 11(2), p. 125. doi: 10.3390/insects11020125.
- 602 Vaca, H. F. and White, C. R. (2010) ‘Environmental modulation of metabolic allometry in ornate  
603 rainbowfish *Rhadinocentrus ornatus*’, *Biology Letters*, 6(1), pp. 136–138. doi:  
604 10.1098/rsbl.2009.0610.
- 605 Vaudo, A. D. *et al.* (2016) ‘Bumble bees regulate their intake of essential protein and lipid pollen  
606 macronutrients’, *Journal of Experimental Biology*, 219(24), pp. 3962–3970. doi: 10.1242/jeb.140772.
- 607 Vaudo, Anthony D. *et al.* (2016) ‘Macronutrient ratios in pollen shape bumble bee (*Bombus*  
608 *impatiens*) foraging strategies and floral preferences’, *Proceedings of the National Academy of*  
609 *Sciences*, 113(28), pp. e40435–e4042. doi: 10.1073/pnas.1606101113.
- 610 Vaudo, A. D. *et al.* (2020) ‘Pollen protein: Lipid macronutrient ratios may guide broad patterns of bee  
611 species floral preferences’, *Insects*, 11(2), p. 132. doi: 10.3390/insects11020132.
- 612 Wang, Y. *et al.* (2016) ‘Starvation stress during larval development facilitates an adaptive response in  
613 adult worker honey bees (*Apis mellifera* L.)’, *Journal of Experimental Biology*, 219(7), pp. 949–959.

Nicholls, Rossi & Niven 2020

- 614 doi: 10.1242/jeb.130435.
- 615 Westerterp, K. R., Wilson, S. A. J. and Rolland, V. (1999) 'Diet induced thermogenesis measured  
616 over 24 h in a respiration chamber: effect of diet composition', *International Journal of Obesity*,  
617 23(3), pp. 287–292. doi: 10.1038/sj.ijo.0800810.
- 618 White, C. R. and Seymour, R. S. (2003) 'Mammalian basal metabolic rate is proportional to body  
619 mass<sup>2/3</sup>', *Proceedings of the National Academy of Sciences*, 100(7), pp. 4046–4049. doi:  
620 10.1073/pnas.0436428100.
- 621 Willmer, P. and Finlayson, K. (2014) 'Big bees do a better job: intraspecific size variation influences  
622 pollination effectiveness', *Journal of Pollination Ecology*, 14, pp. 244–54. doi: 10.26786/1920-  
623 7603(2014)22.
- 624 Wright, G. A., Nicolson, S. W. and Shafir, S. (2018) 'Nutritional physiology and ecology of honey  
625 bees', *Annual Review of Entomology*, 63, pp. 327–344. doi: 10.1146/annurev-ento-020117-043423.
- 626 Wright, P. A. (1995) 'Nitrogen excretion: Three end products, many physiological roles', *Journal of*  
627 *Experimental Biology*, 198(2), pp. 273–281.
- 628 Yang, Y. and Joern, A. (1994) 'Compensatory feeding in response to variable food quality by  
629 *Melanoplus differentialis*', *Physiological Entomology*, 19(1), pp. 75–82. doi: 10.1111/j.1365-  
630 3032.1994.tb01077.x.
- 631 Zanutto, F. P. *et al.* (1997) 'Nutritional homeostasis in locusts: Is there a mechanism for increased  
632 energy expenditure during carbohydrate overfeeding?', *Journal of Experimental Biology*, 200(18), pp.  
633 2437–2448.
- 634 Ziska, L. H. *et al.* (2016) 'Rising atmospheric CO<sub>2</sub> is reducing the protein concentration of a floral  
635 pollen source essential for north American bees', *Proceedings of the Royal Society B: Biological*  
636 *Sciences*, 283(1828), p. 20160414. doi: 10.1098/rspb.2016.0414.
- 637



Nicholls, Rossi & Niven 2020

## Tables

| diet      | P    | C    | n  | % diet component |             |         |          |       |         |         | P:C ratio |
|-----------|------|------|----|------------------|-------------|---------|----------|-------|---------|---------|-----------|
|           |      |      |    | yeast            | royal jelly | glucose | fructose | water | total P | total C |           |
| <b>D1</b> | med  | med  | 78 | 1.0              | 51.0        | 4.1     | 8.2      | 35.7  | 8.2     | 18.5    | 1:2.3     |
| <b>D2</b> | med  | high | 60 | 1.0              | 48.1        | 5.8     | 11.5     | 33.7  | 7.7     | 23.2    | 1:3.0     |
| <b>D3</b> | med  | low  | 78 | 1.1              | 54.3        | 2.2     | 4.3      | 38.0  | 8.7     | 13.1    | 1:1.5     |
| <b>D4</b> | high | med  | 78 | 0.9              | 57.5        | 3.5     | 7.1      | 31.0  | 9.2     | 17.6    | 1:1.9     |
| <b>D5</b> | low  | med  | 77 | 1.2              | 42.2        | 4.8     | 9.6      | 42.2  | 6.8     | 19.5    | 1:2.9     |

**Table 1** | Composition of artificial diets fed to larvae in the P:C ratio diet manipulation experiment (P = Protein, C = Carbohydrate).

| diet       | time to emergence<br>(days) |                  | body mass<br>(mg) |                 | body size<br>(mm)   |                  | body condition<br>(mg/mm) |                 |
|------------|-----------------------------|------------------|-------------------|-----------------|---------------------|------------------|---------------------------|-----------------|
|            | estimate ± s.e.             | <i>p</i> -value  | estimate ± s.e.   | <i>p</i> -value | estimate ± s.e.     | <i>p</i> -value  | estimate ± s.e.           | <i>p</i> -value |
| D1 –<br>D2 | <b>-0.50 ± 0.13</b>         | <b>&lt;0.001</b> | 0.91 ± 3.07       | 0.991           | -0.00 ± 0.05        | 1.000            | <b>3.40 ± 1.14</b>        | <b>0.021</b>    |
| D4 –<br>D2 | <b>-0.63 ± 0.18</b>         | <b>&lt;0.001</b> | -9.23 ± 4.35      | 0.154           | <b>-0.24 ± 0.06</b> | <b>0.002</b>     | 2.40 ± 1.38               | 0.315           |
| D5 –<br>D2 | <b>-0.36 ± 0.13</b>         | <b>&lt;0.025</b> | 0.68 ± 4.22       | 0.996           | -0.07 ± 0.05        | 0.500            | 2.70 ± 1.13               | 0.890           |
| D4 –<br>D1 | -0.18 ± 0.17                | 0.714            | -10.14 ± 3.07     | 0.083           | <b>-0.24 ± 0.05</b> | <b>&lt;0.001</b> | -1.00 ± 1.40              | 0.090           |
| D5 –<br>D1 | 0.14 ± 0.12                 | 0.676            | -0.23 ± 2.99      | 0.100           | -0.07 ± 0.04        | 0.333            | -0.70 ± 1.14              | 0.927           |
| D5 –<br>D4 | 0.32 ± 0.17                 | 0.243            | 9.09 ± 4.17       | 0.088           | <b>0.17 ± 0.05</b>  | <b>0.008</b>     | 0.30 ± 1.38               | 0.996           |

**Table 2|** Least-square pairwise comparisons of the effect of diet treatment on the time to adult emergence, body mass on emergence, body size and body condition. Models applied were (days to emergence ~ diet + (1|grafting cohort)), (body mass ~ diet + (1|grafting cohort)), (body size ~ diet + (1|grafting cohort)) and (body condition ~ diet) respectively. *P*-values were adjusted using the Tukey method. (P:C ratio in diets: D1 = 1:2.3; D2 = 1:3.0; D4 = 1:1.9; D5 = 1:2.9). The number of bees measured in each treatment is as follows: D1=28; D2=33; D3=0; D4=10; D5=30. See Table S3 for the complete outcome of the models.

Nicholls, Rossi & Niven 2020

| <b>diet</b> | <b>P:C</b> | <b>n</b> | <b>log slope ± s.e.</b> | <b>log intercept ± s.e.</b> | <b>regression equation</b>                       |
|-------------|------------|----------|-------------------------|-----------------------------|--------------------------------------------------|
| <b>D1</b>   | 1:2.3      | 28       | 0.397 ± 0.52            | 2.155 ± 2.33                | $R^2 = 0.022$ , $F_{1,26} = 0.585$ , $p = 0.451$ |
| <b>D2</b>   | 1:3.0      | 33       | 1.489 ± 0.28            | -2.674 ± 1.22               | $R^2 = 0.486$ , $F_{1,31} = 29.27$ , $p < 0.001$ |
| <b>D4</b>   | 1:1.9      | 10       | 0.160 ± 0.94            | 3.168 ± 4.14                | $R^2 = 0.003$ , $F_{1,8} = 0.029$ , $p = 0.870$  |
| <b>D5</b>   | 1:2.9      | 30       | 1.016 ± 0.36            | -0.636 ± 1.61               | $R^2 = 0.223$ , $F_{1,28} = 8.035$ , $p = 0.008$ |

**Table 3** | Scaling relationship between body mass (mg) and RMR ( $\mu\text{L CO}_2 \text{ h}^{-1}$ ) for adult bees reared on different larval diets. Slopes and intercepts  $\pm$  s.e. calculated *via* least-squares regression.

|                                                                                 |                       | estimate ± s.e. | d.f.  | t-value | p-value          | variance ± s.d. |
|---------------------------------------------------------------------------------|-----------------------|-----------------|-------|---------|------------------|-----------------|
| <b>RMR</b><br>( $\mu\text{L CO}_2 \text{h}^{-1}$ )                              | <b>fixed effects</b>  |                 |       |         |                  |                 |
|                                                                                 | Intercept (D2)        | -1.21 ± 1.27    | 92.16 | -0.95   | 0.343            |                 |
|                                                                                 | D1                    | 4.36 ± 2.10     | 92.05 | 2.08    | <b>0.040</b>     |                 |
|                                                                                 | D4                    | 2.40 ± 4.63     | 92.46 | 0.52    | 0.610            |                 |
|                                                                                 | D5                    | 4.02 ± 2.33     | 92.58 | 1.73    | 0.088            |                 |
|                                                                                 | (log)Body Mass        | 1.17 ± 0.28     | 92.86 | 4.09    | <b>&lt;0.001</b> |                 |
|                                                                                 | D1: (log)Body Mass    | -1.00 ± 0.47    | 92.03 | -2.14   | <b>0.035</b>     |                 |
|                                                                                 | D4: (log)Body Mass    | -0.58 ± 1.05    | 92.43 | -0.55   | 0.582            |                 |
|                                                                                 | D5: (log)Body Mass    | -0.93 ± 0.52    | 92.61 | -1.79   | 0.077            |                 |
|                                                                                 | <b>random effects</b> |                 |       |         |                  |                 |
|                                                                                 | grafting cohort       |                 |       |         |                  | 0.04 ± 0.20     |
|                                                                                 | residual              |                 |       |         |                  | 0.08 ± 0.29     |
| <b>mass-specific RMR</b><br>( $\mu\text{L CO}_2 \text{mg}^{-1} \text{h}^{-1}$ ) | <b>fixed effects</b>  |                 |       |         |                  |                 |
|                                                                                 | Intercept (D2)        | -1.21 ± 1.27    | 92.16 | -0.95   | 0.343            |                 |
|                                                                                 | D1                    | 4.36 ± 2.10     | 92.05 | 2.08    | <b>0.040</b>     |                 |
|                                                                                 | D4                    | 2.40 ± 4.63     | 92.46 | 0.52    | 0.610            |                 |
|                                                                                 | D5                    | 4.02 ± 2.33     | 92.58 | 1.73    | 0.088            |                 |
|                                                                                 | (log)Body Mass        | 0.17 ± 0.28     | 92.86 | 0.58    | 0.563            |                 |
|                                                                                 | D1: (log)Body Mass    | -1.00 ± 0.47    | 92.03 | -2.14   | <b>0.035</b>     |                 |
|                                                                                 | D4: (log)Body Mass    | -0.58 ± 1.05    | 92.43 | -0.55   | 0.582            |                 |
|                                                                                 | D5: (log)Body Mass    | -0.93 ± 0.52    | 92.61 | -1.79   | 0.077            |                 |
|                                                                                 | <b>random effects</b> |                 |       |         |                  |                 |
|                                                                                 | grafting cohort       |                 |       |         |                  | 0.04 ± 0.20     |
|                                                                                 | residual              |                 |       |         |                  | 0.08 ± 0.29     |

**Table 4** | Effect of larval diet and body mass (mg) on RMR, and diet and body mass on mass-specific RMR. Models used were  $(\log(\text{RMR}) \sim \text{diet} * \log(\text{body mass}) + (1|\text{grafting cohort}))$  and  $(\log(\text{mass-specific RMR})) \sim \text{diet} * \log(\text{body mass}) + (1|\text{grafting cohort}))$  respectively. The number of bees tested in each treatment is as follows: D1=28; D2=33; D3=0; D4=10; D5=30.

## Figures

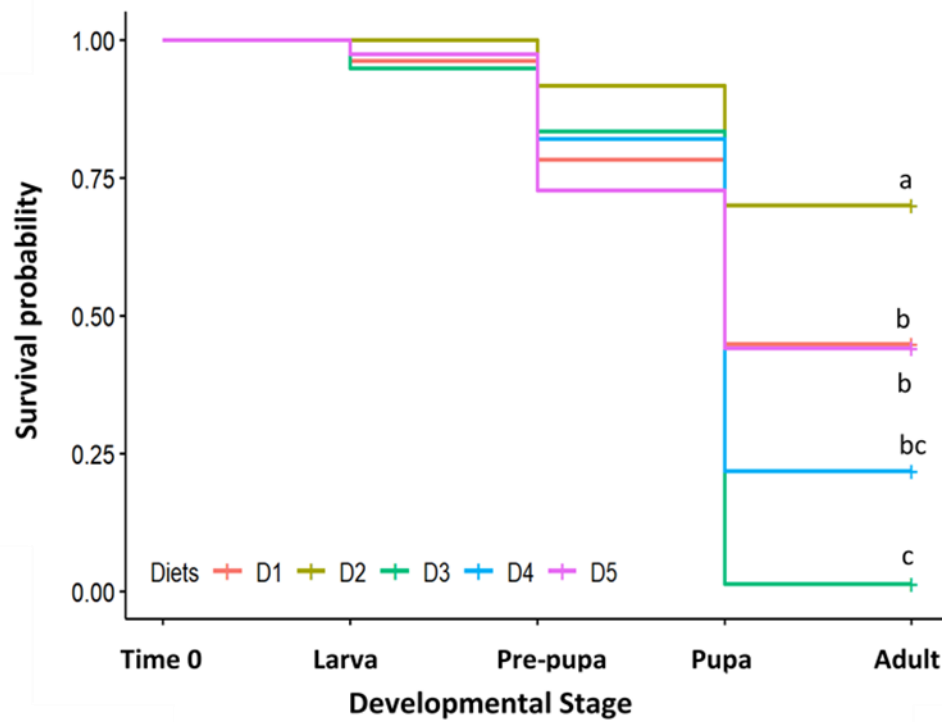

**Figure 1** | Probability of survival of bees reared on different larval diets (P:C ratio in diets: D1 = 1:2.3; D2 = 1:3.0; D3 = 1:1.5; D4 = 1:1.9; D5 = 1:2.9). The number of larvae in each treatment group at Time 0 is as follows: D1= 78; D2=60; D3=78; D4=78; D5=77. Crosses indicate the proportion of individuals in each diet treatment that reached adulthood (censored data). Letters indicate statistically significant differences in survival ( $p < 0.05$ , Kaplan-Meier analysis).

Nicholls, Rossi & Niven 2020

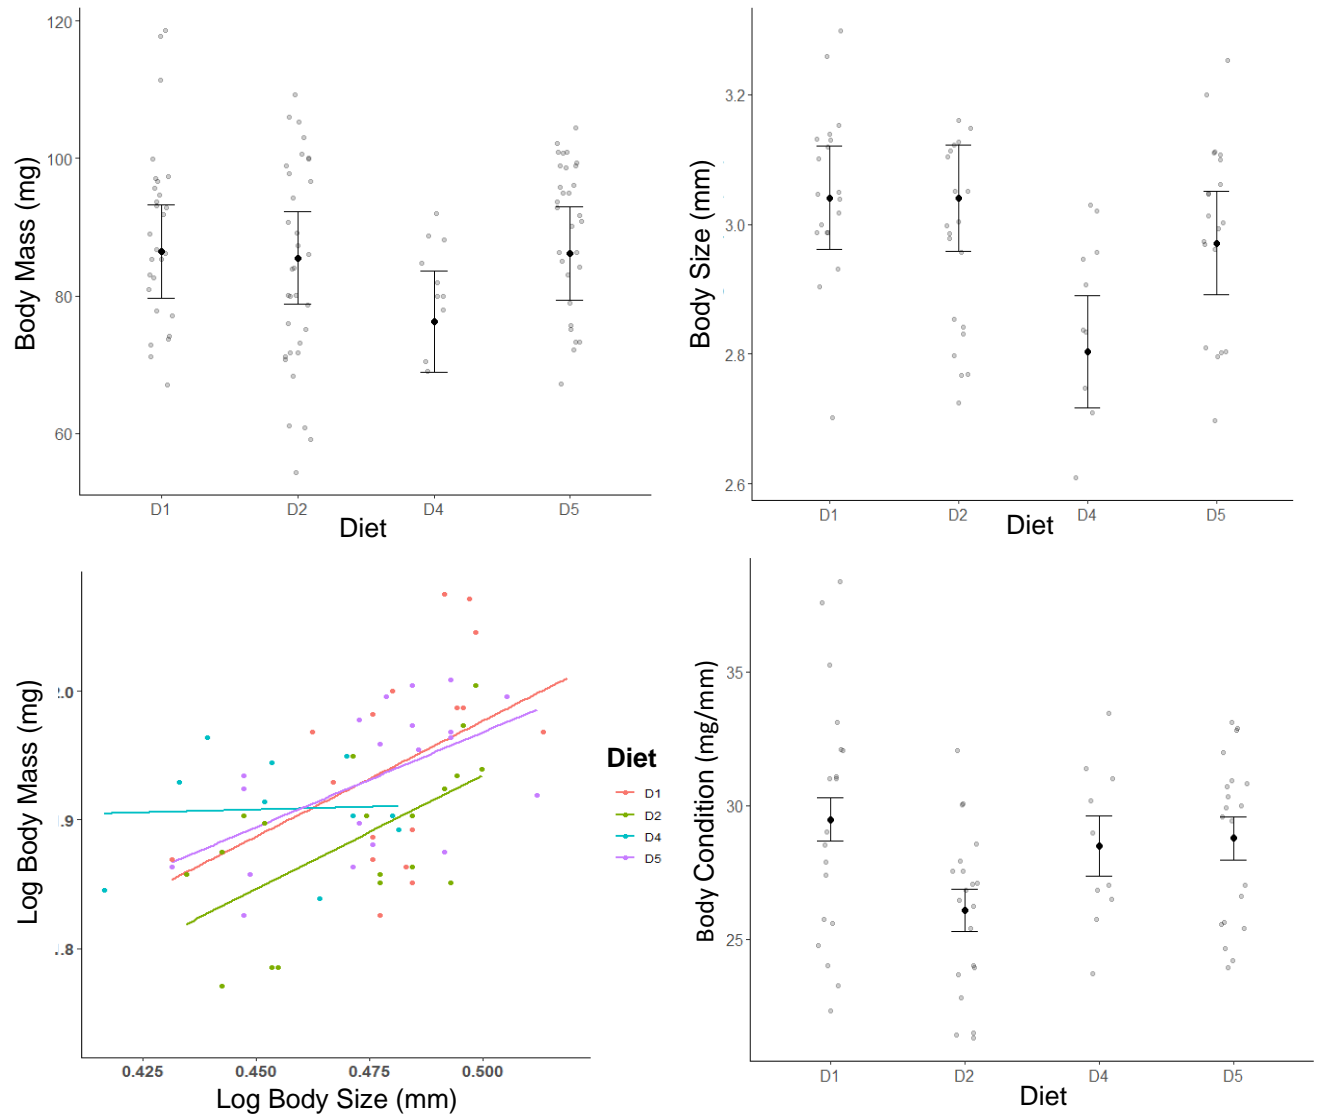

**Figure 2** | Body mass (A) body size (B) the scaling of body mass and body size (C) and body condition (body mass/body size) (D) of adult bees in each diet treatment. Grey points are the individual data points, black points represent the estimated marginal mean and whiskers are the standard error of the mean. (P:C ratio in diets: D1= 1:2.3; D2 = 1:3.0; D4 = 1:1.9; D5 = 1:2.9). The number of bees measured in each treatment is as follows: D1=28; D2=33; D3=0; D4=10; D5=30.



Nicholls, Rossi & Niven 2020

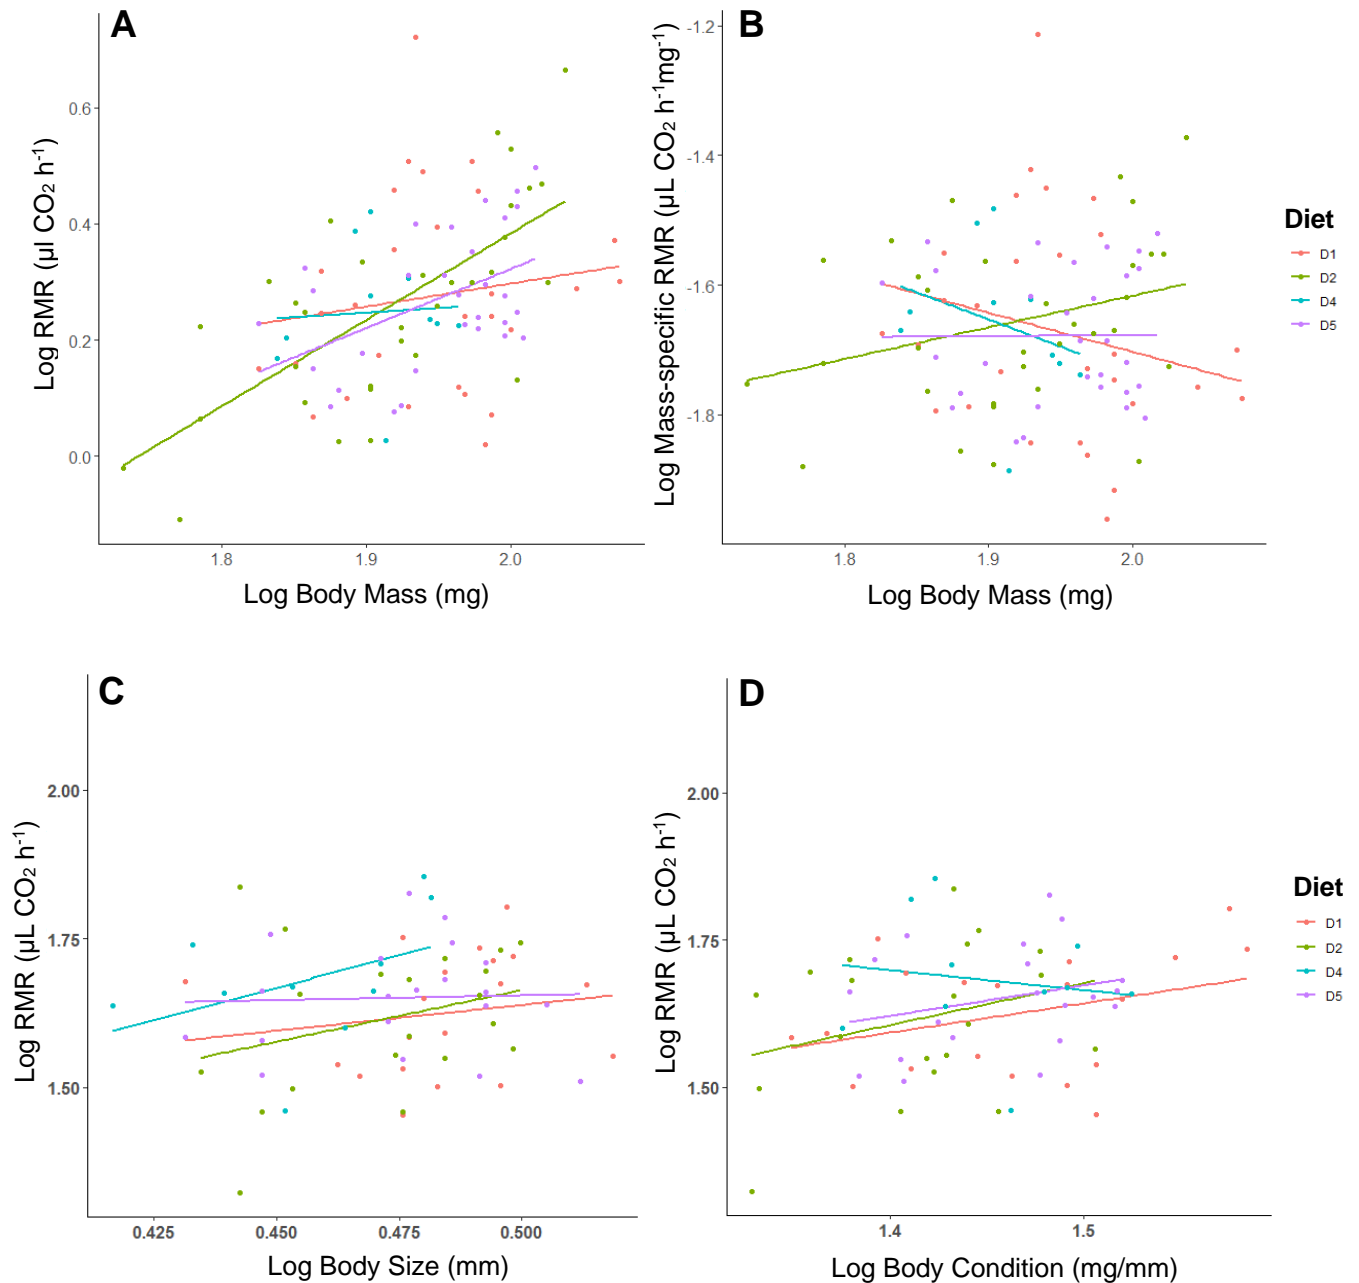

**Figure 3** | Scaling between  $\text{CO}_2$  production (RMR) and body mass (A), mass-specific RMR and body mass (B), RMR and body size (intertegular distance) (C) and RMR and body condition (body mass/body size) (D) for bees reared on larval diets differing in P:C ratio (D1 = 1:2.3; D2 = 1:3.0; D3 = 1:1.5; D4 = 1:1.9; D5 = 1:2.9). The number of bees tested in each treatment is as follows: D1=28; D2=33; D3=0; D4=10; D5=30.
